# Supplementary material
Source: ML conference proceedings conference paper supplement (https://openaccess.thecvf.com/content/CVPR2023/html/Garcia_Uncurated_Image-Text_Datasets_CVPR_2023_paper.html)
Supplement: Supplementary file 1 [file Garcia_Uncurated_Image-Text_Datasets_CVPR_2023_supplemental.pdf]

# Uncurated Image-Text Datasets: Shedding Light on Demographic Bias

## Supplementary Material

Noa Garcia

Yusuke Hirota

Yankun Wu

Yuta Nakashima

{noagarcia@, y-hirota@is., yankun@is., n-yuta@}ids.osaka-u.ac.jp

Osaka University

This document includes additional information to support the claims and experimental results in the main paper. The document is divided into the following sections:

- Section **A**: PHASE 🟡 statistics.
- Section **B**: YOLOv5 bias evaluation.
- Section **C**: CLIP evaluation results.
- Section **D**: Stable Diffusion results.

### A. PHASE 🟡 statistics

Statistics about the number of annotations per attribute and class are reported in Table 3. For each class, we show the *number of annotations* as the raw annotations for the given class, the *number of regions* as the region-level annotations reached after annotator majority voting, and the *number of images* as the images with at least one region-level annotation with the class of interest.

### B. YOLOv5 bias evaluation

Following findings about bias in pre-trained object detection models [1], we evaluate YOLOv5 in terms of skin-tone bias to check whether the use of this model can be a contributing factor to the representation discrepancies in PHASE 🟡 annotations. We detect people in MSCOCO and compare accuracy per skin-tone using [2] annotations. Results are reported as follows: *darker* skin-tone recall is 0.49, and *lighter* skin-tone recall is 0.55. This shows that there is, indeed, a difference in performance according to skin-tone. However, we believe that it is not as big as to justify the representation gap that was found in the GCC dataset and the conclusions of our analysis still stand.

### C. CLIP evaluation results

We report the results of the CLIP evaluation when balancing the number of samples per class and attribute. Table 4 compares CLIP performance in  $R@k$  for  $k = 1, 5, 10$  when using all the samples in the validation set (Unbalanced), and when using the same number of samples per class and attribute (Balanced). For the balanced results, we

Table 1. CLIP embeddings evaluation on PHASE 🟡 validation set when detected person bounding boxes are occluded (black).

| Attribute |                 | Samples | R@1  | R@5  | R@10 |
|-----------|-----------------|---------|------|------|------|
| age       | baby & child    | 350     | 12.9 | 23.4 | 29.1 |
|           | young           | 1,349   | 8.6  | 16.7 | 21.9 |
|           | adult           | 1,509   | 9.4  | 19.9 | 25.6 |
|           | senior          | 128     | 11.7 | 28.9 | 34.4 |
| gender    | man             | 1,950   | 12.0 | 24.3 | 30.6 |
|           | woman           | 1,617   | 8.1  | 15.3 | 20.0 |
| skin-tone | lighter         | 3,166   | 8.5  | 17.5 | 22.9 |
|           | darker          | 318     | 11.6 | 25.2 | 29.6 |
| ethnicity | Black           | 194     | 9.3  | 20.1 | 23.2 |
|           | East Asian      | 58      | 8.6  | 31.0 | 36.2 |
|           | Indian          | 90      | 11.1 | 28.9 | 35.6 |
|           | Latino          | 28      | 7.1  | 14.3 | 17.9 |
|           | Middle Eastern  | 16      | 12.5 | 12.5 | 25.0 |
|           | Southeast Asian | 16      | 12.5 | 12.5 | 12.5 |
| White     | 2,231           | 8.7     | 17.4 | 23.0 |      |

use the number of samples in the smallest class in each attribute. Results are reported as mean and standard deviation over 100 runs with different random samples per class.

**CLIP with occlusions** To better understand what about the image leads to differing performances, we occlude the detected bounding boxes and repeat the evaluation process. We find that masking people bounding boxes makes CLIP’s  $R@1$  drop from about 30% to 8% for all the attributes, which means that relevant information is contained in person regions. Moreover, as shown in Table 1, the conclusions are maintained, *e.g.* recall for *man* is higher than for *woman*, which suggests that part of the bias is from the language.

### D. Stable Diffusion results

Table 2 reports the statistics of Stable Diffusion’s Safety Checker per attribute and class. We compare the percentage

Table 2. Classes in the validation set and classes labeled as unsafe by Stable Diffusion’s Safety Checker.

| Attribute                 | Validation set (%) | Unsafe label (%) |
|---------------------------|--------------------|------------------|
| <b>age</b>                |                    |                  |
| baby                      | 0.89               | 3.23             |
| child                     | 6.70               | 12.90            |
| young                     | 29.24              | 32.26            |
| adult                     | 32.70              | 32.26            |
| senior                    | 2.77               | 3.23             |
| <i>unsure</i>             | <i>1.11</i>        | <i>0.00</i>      |
| <i>multiple</i>           | <i>26.59</i>       | <i>16.13</i>     |
| <b>gender</b>             |                    |                  |
| man                       | 42.26              | 35.48            |
| woman                     | 35.04              | 51.61            |
| <i>unsure</i>             | <i>0.98</i>        | <i>0.00</i>      |
| <i>multiple</i>           | <i>21.72</i>       | <i>12.90</i>     |
| <b>skin-tone (binary)</b> |                    |                  |
| lighter                   | 68.62              | 80.65            |
| darker                    | 6.89               | 3.23             |
| <i>unsure</i>             | <i>5.66</i>        | <i>3.23</i>      |
| <i>multiple</i>           | <i>18.83</i>       | <i>12.90</i>     |
| <b>ethnicity</b>          |                    |                  |
| Black                     | 4.20               | 3.23             |
| East Asian                | 1.26               | 0.00             |
| Indian                    | 1.95               | 3.23             |
| Latino                    | 0.61               | 0.00             |
| Middle Eastern            | 0.35               | 0.00             |
| Southeast Asian           | 0.35               | 0.00             |
| White                     | 48.35              | 64.52            |
| <i>unsure</i>             | <i>5.52</i>        | <i>3.23</i>      |
| <i>multiple</i>           | <i>37.41</i>       | <i>25.81</i>     |

of samples per class in the image annotations, with the percentage of samples per class labeled as unsafe by the Safety Checker. It stands out that the class *woman* raises 51.61% of the unsafe labels whereas only accounts for 35.04% of the original images. *Lighter* skin-tone and *White* ethnicity also show big increases in the percentage of samples raised as unsafe, but differently from the *woman* class, both of them are the predominant class in their respective attributes.

## References

- [1] Benjamin Wilson, Judy Hoffman, and Jamie Morgenstern. Predictive inequity in object detection. *arXiv preprint arXiv:1902.11097*, 2019. 1
- [2] Dora Zhao, Angelina Wang, and Olga Russakovsky. Understanding and evaluating racial biases in image captioning. In *ICCV*, 2021. 1

Table 3. Statistics of annotations in PHASE 🟡 per attribute and class. *Annotations* reports the raw number of annotations per class. *Regions* is the total number of region-level annotations after majority voting. *Images* accounts for the number of images with at least one region-level annotation with the class. Due to the inter-annotator agreement results, skin-tone region-level annotations are conducted for binary skin-tone only. For each attribute, the most common class is highlighted in **bold** and the unsure class in *italics*.

| Attribute       | Annotations   | Regions       | Images        | Attribute          | Annotations   | Regions       | Images        |
|-----------------|---------------|---------------|---------------|--------------------|---------------|---------------|---------------|
| age             | 106,041       | 35,347        | 18,889        | skin-tone type     | 105,801       | -             | -             |
| baby            | 955           | 306           | 259           | type 1             | 15,388        | -             | -             |
| child           | 7,829         | 2,578         | 1,569         | <b>type 2</b>      | <b>49,821</b> | -             | -             |
| young adult     | 40,398        | 13,313        | 8,841         | type 3             | 18,083        | -             | -             |
| <b>adult</b>    | <b>48,604</b> | <b>16,117</b> | <b>10,631</b> | type 4             | 8,219         | -             | -             |
| senior          | 4,632         | 1,375         | 1,152         | type 5             | 5,771         | -             | -             |
| <i>unsure</i>   | <i>3,623</i>  | <i>653</i>    | <i>525</i>    | type 6             | 4,570         | -             | -             |
| gender          | 106,041       | 35,347        | 18,889        | <i>unsure</i>      | <i>3,949</i>  | -             | -             |
| <b>man</b>      | <b>67,122</b> | <b>22,491</b> | <b>13,511</b> | skin-tone (binary) | -             | 35,347        | 18,889        |
| woman           | 36,936        | 12,406        | 8,329         | <b>lighter</b>     | -             | <b>28,187</b> | <b>16,245</b> |
| <i>unsure</i>   | <i>1,983</i>  | <i>285</i>    | <i>241</i>    | darker             | -             | 5,572         | 3,838         |
| ethnicity       | 105,801       | 35,347        | 18,889        | <i>unsure</i>      | -             | 922           | 730           |
| Black           | 11,314        | 3,664         | 2,657         | activity           | 97,021        | 35,347        | 18,889        |
| East Asian      | 3,957         | 953           | 707           | caring             | 786           | 127           | 119           |
| Indian          | 4,434         | 980           | 616           | music              | 14,706        | 5,012         | 3,218         |
| Latino          | 8,826         | 1,309         | 1,168         | eating             | 1,012         | 278           | 206           |
| Middle Eastern  | 5,513         | 373           | 349           | household          | 180           | 19            | 18            |
| Southeast Asian | 2,706         | 211           | 174           | personal           | 291           | 39            | 33            |
| <b>White</b>    | <b>63,253</b> | <b>22,098</b> | <b>13,698</b> | <b>posing</b>      | <b>30,409</b> | <b>10,121</b> | <b>6,619</b>  |
| <i>unsure</i>   | <i>5,578</i>  | <i>1,289</i>  | <i>1,021</i>  | sports             | 19,933        | 6,725         | 3,807         |
| emotion         | 100,248       | 35,347        | 18,889        | transportation     | 811           | 224           | 181           |
| happy           | 41,059        | 12,603        | 8,215         | work               | 5,043         | 1,433         | 891           |
| sad             | 2,221         | 331           | 308           | sports             | 19,933        | 6,725         | 3,807         |
| fear            | 1,205         | 117           | 114           | other              | 22,770        | 7,249         | 4,247         |
| anger           | 2,391         | 377           | 346           | <i>unsure</i>      | <i>1,080</i>  | <i>164</i>    | <i>149</i>    |
| <b>neutral</b>  | <b>47,367</b> | <b>16,646</b> | <b>10,473</b> |                    |               |               |               |
| <i>unsure</i>   | <i>6,005</i>  | <i>1,663</i>  | <i>1,224</i>  |                    |               |               |               |

Table 4. CLIP evaluation on PHASE validation set. Results are reported as  $R@k$  for  $k = 1, 5, 10$ . *Unbalanced* denotes when all the samples are used, resulting in highly unbalanced classes. *Balanced* denotes when using the same number of samples per class and attribute.

| Attribute | Class           | Unbalanced |      |      |      | Balanced |                 |                 |                 |
|-----------|-----------------|------------|------|------|------|----------|-----------------|-----------------|-----------------|
|           |                 | Size       | R@1  | R@5  | R@10 | Size     | R@1             | R@5             | R@10            |
| age       | baby & child    | 350        | 44.0 | 65.4 | 74.0 | 128      | $44.0 \pm 3.5$  | $65.3 \pm 3.4$  | $73.9 \pm 3.1$  |
|           | young           | 1,349      | 30.4 | 51.3 | 60.9 | 128      | $29.8 \pm 3.9$  | $51.0 \pm 4.5$  | $60.8 \pm 4.4$  |
|           | adult           | 1,509      | 27.3 | 46.7 | 55.9 | 128      | $27.5 \pm 3.8$  | $46.5 \pm 4.2$  | $55.4 \pm 4.1$  |
|           | senior          | 128        | 44.5 | 64.1 | 71.1 | 128      | $44.5 \pm 0.0$  | $64.1 \pm 0.0$  | $71.1 \pm 0.0$  |
| gender    | man             | 1,950      | 32.0 | 53.2 | 63.1 | 1,617    | $32.1 \pm 0.4$  | $53.2 \pm 0.5$  | $63.1 \pm 0.4$  |
|           | woman           | 1,617      | 30.6 | 49.8 | 59.1 | 1,617    | $30.6 \pm 0.0$  | $49.8 \pm 0.0$  | $59.1 \pm 0.0$  |
| skin-tone | lighter         | 3,166      | 30.2 | 50.6 | 59.9 | 318      | $30.1 \pm 2.6$  | $50.4 \pm 2.8$  | $60.1 \pm 2.8$  |
|           | darker          | 318        | 31.1 | 54.1 | 62.3 | 318      | $31.1 \pm 0.0$  | $54.1 \pm 0.0$  | $62.3 \pm 0.0$  |
| ethnicity | Black           | 194        | 29.4 | 51.5 | 58.8 | 16       | $29.1 \pm 11.5$ | $49.9 \pm 11.2$ | $57.7 \pm 11.4$ |
|           | East Asian      | 58         | 34.8 | 56.9 | 63.8 | 16       | $33.5 \pm 10.5$ | $56.4 \pm 10.5$ | $64.2 \pm 10.7$ |
|           | Indian          | 90         | 34.4 | 61.1 | 68.9 | 16       | $34.4 \pm 12.3$ | $61.9 \pm 11.8$ | $69.5 \pm 11.4$ |
|           | Latino          | 28         | 21.4 | 39.3 | 50.0 | 16       | $21.4 \pm 6.2$  | $37.9 \pm 8.2$  | $48.6 \pm 8.6$  |
|           | Middle Eastern  | 16         | 31.3 | 62.5 | 75.0 | 16       | $31.3 \pm 0.0$  | $62.5 \pm 0.0$  | $75.0 \pm 0.0$  |
|           | Southeast Asian | 16         | 31.3 | 37.5 | 56.3 | 16       | $31.3 \pm 0.0$  | $37.5 \pm 0.0$  | $56.3 \pm 0.0$  |
|           | White           | 2,231      | 30.6 | 50.6 | 59.5 | 16       | $31.2 \pm 12.6$ | $50.8 \pm 12.3$ | $59.3 \pm 11.7$ |
